# Supplementary material for: Pd-catalyzed formal Mizoroki–Heck coupling of unactivated alkyl chlorides
Source: PubMed Central journal article supplement (PMC7881129; doi:10.1038/s41467-021-21270-9), 2021-02-12
Supplement: 41467_2021_21270_MOESM2_ESM.pdf [file 41467_2021_21270_MOESM2_ESM.pdf]

## **Description of Additional Supplementary Files**

File Name: Supplementary Data 1

Description: Cartesian coordinates of DFT-optimized structures
